# Supplementary material for: A Comparative Analysis of the ADOS-G and ADOS-2 Algorithms: Preliminary Findings
Source: Springer Nature journal article supplement (doi:10.1007/s10803-018-3475-3), 2018-01-27
Supplement: MOESM1 [file 15422418]

**Appendix A** Line-by-line literature search example.

**Search Date:** November 26, 2017

**Database Searched:** PsychInfo

**Search Terms:** “ADOS” AND “accuracy”

**Limiting criteria:** None

**Results:** 39 articles

**Analysis (overview of article titles, key words, and check for duplications from other databases):** 39 articles

**Outcome:** 1 article

**Application of review inclusion/exclusion criteria:** 1 article

**Outcome:** 0 articles (no additional studies met inclusion/exclusion criteria)
