# Supplementary material for: A Comparative Analysis of the ADOS-G and ADOS-2 Algorithms: Preliminary Findings
Source: Springer Nature journal article supplement (doi:10.1007/s10803-018-3475-3), 2018-01-27
Supplement: MOESM3 [file 15422418]

**Appendix C** Study diagnostic accuracy by ADOS module and algorithm.

| **Module** | **Algorithm Type** | **Study** | **N** | **True Positive (TP)** | **False Positive (FP)** | **False Negative (FN)** | **True Negative (TN)** | **Sensitivity** | **95% CI** | **Specificity** | **95% CI** |
| --- | --- | --- | --- | --- | --- | --- | --- | --- | --- | --- | --- |
| **1** | **ADOS-G** | Gotham et al. 2007 | 847 | 644 | 49 | 78 | 76 | 0.89 | 0.87 - 0.91 | 0.61 | 0.52 - 0.69 |
|  |  | Gotham et al. 2008 | 488 | 330 | 18 | 48 | 92 | 0.87 | 0.84 - 0.91 | 0.84 | 0.77 - 0.91 |
|  |  | Wiggins & Robins 2008 | 142 | 70 | 24 | 3 | 45 | 0.96 | 0.91 - 1.0 | 0.65 | 0.54 - 0.76 |
|  |  | de Bildt et al. 2009 | 99 | 63 | 6 | 12 | 18 | 0.84 | 0.76 - 0.92 | 0.75 | 0.58 - 0.92 |
|  |  | Oosterling et al. 2010 | 257 | 133 | 23 | 34 | 67 | 0.8 | 0.74 - 0.86 | 0.74 | 0.65 - 0.83 |
|  |  | Molloy et al. 2011 | 177 | 114 | 21 | 14 | 28 | 0.89 | 0.84 - 0.94 | 0.57 | 0.43 - 0.71 |
|  |  |  |  |  |  |  |  |  |  |  |  |
| **1** | **ADOS-2 No Words** | Gotham et al. 2007 | 495 | 411 | 25 | 35 | 24 | 0.92 | 0.90 - 0.95 | 0.49 | 0.35 - 0.63 |
|  |  | Gotham et al. 2008 | 249 | 175 | 9 | 28 | 37 | 0.86 | 0.81 - 0.91 | 0.8 | 0.69 - 0.92 |
|  |  | Oosterling et al. 2010 | 79 | 64 | 3 | 5 | 7 | 0.93 | 0.87 - 0.99 | 0.7 | 0.42 - 0.98 |
|  |  | Molloy et al. 2011 | 87 | 61 | 9 | 9 | 8 | 0.87 | 0.79 - 0.95 | 0.47 | 0.23 - 0.71 |
|  |  | Zander, Sturm, & Bolte 2015 | 93 | 66 | 7 | 6 | 14 | 0.92 | 0.85 - 0.98 | 0.67 | 0.47 - 0.87 |
|  |  |  |  |  |  |  |  |  |  |  |  |
| **1** | **ADOS-2 Some Words** | Gotham et al. 2007 | 352 | 240 | 10 | 36 | 66 | 0.87 | 0.83 - 0.91 | 0.87 | 0.79 - 0.94 |
|  |  | Gotham et al. 2008 | 239 | 161 | 11 | 14 | 53 | 0.92 | 0.88 - 0.96 | 0.83 | 0.74 - 0.92 |
|  |  | de Bildt et al. 2009 | 99 | 67 | 8 | 8 | 16 | 0.89 | 0.82 - 0.96 | 0.67 | 0.48 - 0.86 |
|  |  | Oosterling et al. 2010 | 178 | 71 | 11 | 27 | 69 | 0.72 | 0.64 - 0.81 | 0.86 | 0.79 - 0.94 |
|  |  | Molloy et al. 2011 | 90 | 56 | 14 | 2 | 18 | 0.97 | 0.92 - 1.00 | 0.56 | 0.39 - 0.73 |
|  |  | Zander, Sturm, & Bolte 2015 | 93 | 56 | 6 | 8 | 23 | 0.88 | 0.79 - 0.96 | 0.79 | 0.65 - 0.94 |
|  |  |  |  |  |  |  |  |  |  |  |  |
| **2** | **ADOS-G** | Gotham et al. 2007 | 329 | 239 | 9 | 30 | 51 | 0.89 | 0.85 - 0.93 | 0.85 | 0.76 - 0.94 |
|  |  | Gotham et al. 2008 | 87 | 60 | 0 | 9 | 18 | 0.87 | 0.79 - 0.95 | 1 | 1.00 - 1.00 |
|  |  | de Bildt et al. 2009 | 124 | 44 | 11 | 30 | 39 | 0.59 | 0.48 - 0.71 | 0.78 | 0.67 - 0.89 |
|  |  | Oosterling et al. 2010 | 203 | 68 | 3 | 65 | 67 | 0.51 | 0.43 - 0.60 | 0.96 | 0.91 - 1.00 |
|  |  | Molloy et al. 2011 | 198 | 77 | 15 | 28 | 78 | 0.73 | 0.65 - 0.82 | 0.84 | 0.76 - 0.91 |
|  |  |  |  |  |  |  |  |  |  |  |  |
| **2** | **ADOS-2**  **< 5 Years Old** | Gotham et al. 2007 | 137 | 97 | 4 | 10 | 26 | 0.91 | 0.85 - 0.96 | 0.87 | 0.75 - 0.99 |
|  |  | Gotham et al. 2008 | 87 | 55 | 0 | 14 | 18 | 0.8 | 0.70 - 0.89 | 1 | 1.00 - 1.00 |
|  |  | Oosterling et al. 2010 | 105 | 46 | 5 | 29 | 25 | 0.61 | 0.50 - 0.72 | 0.83 | 0.70 - 0.97 |
|  |  | Molloy et al. 2011 | 107 | 39 | 16 | 15 | 37 | 0.72 | 0.60 - 0.84 | 0.7 | 0.57 - 0.82 |
|  |  | Zander, Sturm, & Bolte 2015 | 72 | 31 | 11 | 1 | 29 | 0.97 | 0.91 - 1.00 | 0.73 | 0.59 - 0.86 |
|  |  |  |  |  |  |  |  |  |  |  |  |
| **2** | **ADOS-2**  **≥ 5 Years Old** | Gotham et al. 2007 | 192 | 147 | 4 | 15 | 26 | 0.91 | 0.86 - 0.95 | 0.87 | 0.75 - 0.99 |
|  |  | de Bildt et al. 2009 | 124 | 52 | 15 | 22 | 35 | 0.7 | 0.60 - 0.81 | 0.7 | 0.57 - 0.83 |
|  |  | Oosterling et al. 2010 | 98 | 37 | 6 | 21 | 34 | 0.64 | 0.51 - 0.76 | 0.85 | 0.74 - 0.96 |
|  |  | Molloy et al. 2011 | 91 | 46 | 15 | 5 | 25 | 0.9 | 0.82 - 0.98 | 0.63 | 0.47 - 0.78 |
|  |  |  |  |  |  |  |  |  |  |  |  |
| **3** | **ADOS-G** | Gotham et al. 2007 | 398 | 243 | 14 | 72 | 69 | 0.77 | 0.73 - 0.82 | 0.83 | 0.75 - 0.91 |
|  |  | Gotham et al. 2008 | 457 | 232 | 5 | 152 | 68 | 0.6 | 0.56 - 0.65 | 0.93 | 0.87 - 0.99 |
|  |  | de Bildt et al. 2009 | 335 | 182 | 17 | 83 | 53 | 0.69 | 0.63 - 0.74 | 0.76 | 0.66 - 0.86 |
|  |  | Molloy et al. 2011 | 209 | 79 | 45 | 17 | 68 | 0.82 | 0.75 - 0.90 | 0.6 | 0.51 - 0.69 |
|  |  | Kamp-Becker et al. 2011 | 252 | 109 | 24 | 17 | 102 | 0.87 | 0.81 - 0.92 | 0.81 | 0.74 - 0.88 |
|  |  |  |  |  |  |  |  |  |  |  |  |
| **3** | **ADOS-2** | Gotham et al. 2007 | 398 | 257 | 17 | 58 | 66 | 0.82 | 0.77 - 0.86 | 0.8 | 0.71 - 0.88 |
|  |  | Gotham et al. 2008 | 457 | 273 | 7 | 111 | 66 | 0.71 | 0.67 - 0.76 | 0.9 | 0.84 - 0.97 |
|  |  | de Bildt et al. 2009 | 335 | 205 | 22 | 60 | 48 | 0.77 | 0.72 - 0.82 | 0.69 | 0.58 - 0.79 |
|  |  | Molloy et al. 2011 | 209 | 86 | 62 | 10 | 51 | 0.9 | 0.83 - 0.96 | 0.45 | 0.36 - 0.54 |
|  |  | Kamp-Becker et al. 2011 | 252 | 117 | 31 | 9 | 95 | 0.93 | 0.88 - 0.97 | 0.75 | 0.68 - 0.83 |
