# Supplementary material for: A Comparative Analysis of the ADOS-G and ADOS-2 Algorithms: Preliminary Findings
Source: Springer Nature journal article supplement (doi:10.1007/s10803-018-3475-3), 2018-01-27
Supplement: MOESM5 [file 15422418]

## Sheet: Article and Author Information
Article Title: A Comparative Analysis of the ADOS-G and ADOS-2 Algorithms: Preliminary Findings
Journal Name: Journal of Autism and Developmental Disorders
Author Names: Taylor Dorlack, Orrin Myers, Piyadasa Kodituwakku
Corresponding Author Affiliation and E-mail Address: Taylor Dorlack, University of Wisconsin-Madison, Department of Educational Psychology, tdorlack@gmail.com

## Sheet: ADOS-G Overall
Study Name	Algorithm Type	Used in Tsheringla et al. Meta-Analysis?	Modules Included? (M1-M3)	Total # Study Cases (Excluding M4 if mentioned)	M1 # Cases	M1 Total Case Chronological Age Range	M1 Total Male Cases	M1 Total Female Cases	M1 # Cases with ASD Diagnosis (Autism + Non-Autism ASD/PDDNOS)	M1 ASD Case Chronological Age Range	M1 # Cases with ASD Diagnosis Male	M1 # Cases with ASD Diagnosis Female	M1 Chronological Age of ASD Cases (Averaged Across Diagnoses: Mn = Mean, Md = Median)	M1 Mean Chronological Age of ASD Cases Standard Deviation (Averaged Across Diagnoses)	M1 # Cases with Nonspectrum Diagnosis	M1 NS Case Chronological Age Range	M1 # Cases with NS Diagnosis Male	M1 # Cases with NS Diagnosis Female	M1 Mean Chronological Age of NS Cases (Mn = Mean, Md = Median)	M1 Mean Chronological Age of NS Cases Standard Deviation	M1 Sensitivity	M1 Specificity	M2 # Cases	M2 Total Case Chronological Age Range	M2 Total Male Cases	M2 Total Female Cases	M2 # Cases with ASD Diagnosis (Autism + Non-Autism ASD/PDDNOS)	M2 ASD Case Chronological Age Range	M2 # Cases with ASD Diagnosis Male	M2 # Cases with ASD Diagnosis Female	M2 Mean Chronological Age of ASD Cases (Averaged Across Diagnoses: Mn = Mean, Md = Median)	M2 Mean Chronological Age of ASD Cases Standard Deviation (Averaged Across Diagnoses)	M2 # Cases with Nonspectrum Diagnosis	M2 NS Case Chronological Age Range	M2 # Cases with NS Diagnosis Male	M2 # Cases with NS Diagnosis Female	M2 Mean Chronological Age of NS Cases (Mn = Mean, Md = Median)	M2 Mean Chronological Age of NS Cases Standard Deviation	M2 Sensitivity	M2 Specificity	M3 # Cases	M3 Total Case Chronological Age Range	M3 Total Male Cases	M3 Total Female Cases	M3 # Cases with ASD Diagnosis (Autism + Non-Autism ASD/PDDNOS)	M3 ASD Case Chronological Age Range	M3 # Cases with ASD Diagnosis Male	M3 # Cases with ASD Diagnosis Female	M3 Mean Chronological Age of ASD Cases (Averaged Across Diagnoses: Mn = Mean, Md = Median)
Lord et al., 2000	ADOS-G	Yes	1, 2, 3	168	54	1.25 - 10.0	41	13	37	0	29	8	4.61 (Mn)	1.765 (Mn)	17	0	12	5	3.51 (Mn)	2.14 (Mn)	97	94	55	2.0 - 7.0	39	16	39	0	30	9	4.47 (Mn)	1.245 (Mn)	16	0	9	7	3.78 (Mn)	1.04 (Mn)	95	88	59	3.0 - 20.0	47	12	41	0	36	5	8.2 (Mn)
Wiggins & Robins, 2008	ADOS-G	Yes	1	142	142	1.33 - 3.08	112	30	73	0	0	0	2.16 (Mn)	0	69	0	0	0	2.16 (Mn)	0	96	65	0	0	0	0	0	0	0	0	0	0	0	0	0	0	0	0	0	0	0	0	0	0	0	0	0	0	0
Molloy et al., 2011	ADOS-G, ADOS-2	Yes	1, 2, 3	584	177	2.20 - 12.0	150	27	128	2.20 - 12.0	109	19	3.725 (Md)	0	24.5	2.50 - 8.30	20.5	4	4.15 (Md)	0	89	57	198	2.40 - 12.0	163	35	105	2.40 - 11.90	93	12	4.95 (Md)	0	93	2.90 - 12.0	74	19	5.15 (Md)	0	73	84	209	4.50 - 16.60	190	19	96	4.70 - 16.60	86	10	8.85 (Md)
de Bildt et al., 2009	ADOS-G, ADOS-2	Yes	1, 2, 3	558	99	1.08 - 12.92	77	22	75	1.08 - 12.0	0	0	5.81 (Mn)	2.13 (Mn)	24	3.08 - 12.92	0	0	8.21 (Mn)	2.91 (Mn)	84	75	124	5.0 - 12.92	98	26	74	5.0 - 12.92	0	0	7.36 (Mn)	2.02 (Mn)	50	5.25 - 12.92	0	0	8.15 (Mn)	2.19 (Mn)	59	78	335	3.92 - 16.50	273	62	265	3.92 - 16.50	0	0	10.17 (Mn)
Kamp-Becker et al., 2011	ADOS-G, ADOS-2	No	3	252	0	0	0	0	0	0	0	0	0	0	0	0	0	0	0	0	0	0	0	0	0	0	0	0	0	0	0	0	0	0	0	0	0	0	0	0	252	4.50 - 16.40	235	17	126	0	0	0	10.15 (Mn)
Gotham et al., 2007	ADOS-G, ADOS-2	Yes	1, 2, 3	1574	847	1.17 - 12.0	0	0	722	1.17 - 12.0	0	0	4.06 (Mn)	1.83 (Mn)	125	1.17 - 10.75	0	0	3.65 (Mn)	1.84 (Mn)	89	61	329	2.33 - 11.92	0	0	269	2.33 - 11.92	0	0	5.83 (Mn)	2.12 (Mn)	60	3.08 - 11.92	0	0	5.82 (Mn)	2.56 (Mn)	89	85	398	3.50 - 16.0	0	0	315	3.50 - 15.25	0	0	8.38 (Mn)
Gotham et al., 2008	ADOS-G, ADOS-2	Yes	1, 2, 3	1032	488	0	0	0	378	0	0	0	3.81 (Mn)	3.81 (Mn)	110	0	0	0	3.38 (Mn)	1.56 (Mn)	87	84	87	0	0	0	69	0	0	0	3.70 (Mn)	0.60 (Mn)	18	0	0	0	4.18 (Mn)	0.47 (Mn)	87	100	457	0	0	0	384	0	0	0	9.82 (Mn)
Oosterling et al., 2010	ADOS-G, ADOS-2	No	1, 2	460	257	1.25 - 6.50	0	0	167	1.50 - 6.50	0	0	3.02 (Mn)	0.87 (Mn)	90	1.25 - 5.50	0	0	2.55 (Mn)	0.60 (Mn)	80	74	203	2.08 - 12.58	0	0	133	2.08 - 12.58	0	0	5.33 (Mn)	1.13 (Mn)	70	2.92 - 8.17	0	0	5.08 (Mn)	0.63 (Mn)	51	96	0	0	0	0	0	0	0	0	0
0 = No information provided
[truncated: 9 more columns]

## Sheet: Mod 1
Author	Study ID	True Positive	False Positive	False Negative	True Negative	Total # Cases	M1 Total # Cases	M1 # Cases ASD	M1 # Cases NS	M1 Sensitivity	M1 Specificity
Lord et al., 2000	1	36	1	1	16	168	54	37	17	97	94
Wiggins & Robins, 2008	2	70	24	3	45	142	142	73	69	96	65
Molloy et al., 2011	3	114	21	14	28	584	177	128	24.5	89	57
de Bildt et al., 2009	4	63	6	12	18	558	99	75	24	84	75
Gotham et al., 2007	5	644	49	78	76	1574	847	722	125	89	61
Gotham et al., 2008	6	330	18	48	92	1032	488	378	110	87	84
Oosterling et al., 2010	7	133	23	34	67	460	257	167	90	80	74

## Sheet: Mod 2
Author	Study ID	True Positive	False Positive	False Negative	True Negative	Total # Cases	M2 Total # Cases	M2 # Cases ASD	M2 # Cases NS	M2 Sensitivity	M2 Specificity
Lord et al., 2000	1	37	2	2	14	168	55	39	16	95	88
Molloy et al., 2011	2	77	15	28	78	584	198	105	93	73	84
de Bildt et al., 2009	3	44	11	30	39	558	124	74	50	59	78
Gotham et al., 2007	4	239	9	30	51	1574	329	269	60	89	85
Gotham et al., 2008	5	60	0	9	18	1032	87	69	18	87	100
Oosterling et al., 2010	6	68	3	65	67	460	203	133	70	51	96

## Sheet: Mod 3
Author	Study ID	True Positive	False Positive	False Negative	True Negative	Total # Cases	M3 Total # Cases	M3 # Cases ASD	M3 # Cases NS	M3 Sensitivity	M3 Specificity
Lord et al., 2000	1	37	1	4	17	168	59	41	18	90	94
Molloy et al., 2011	2	79	45	17	68	584	209	96	113	82	60
de Bildt et al., 2009	3	182	17	83	53	558	335	265	70	69	76
Kamp-Becker et al., 2011	4	109	24	17	102	252	252	126	126	87	81
Gotham et al., 2007	5	243	14	72	69	1574	398	315	83	77	83
Gotham et al., 2008	6	232	5	152	68	1032	457	384	73	60	93
